# Supplementary material for: On Designing a Fire Emergency Vehicle Fleet
Source: Atypon-hosted journal article supplement (doi:10.1287/msom.2023.0357), 2025-09-22
Supplement: msom.2023.0357.sm1.pdf [file msom.2023.0357.sm1.pdf]

**E-Companion**  
**On Designing a Fire Emergency Vehicle Fleet**  
 Yossi Luzon, Opher Baron, Vedat Verter, Oded Berman

**E1**

A.1 Proof of equation (7): For all  $x$  we have

$$\begin{aligned}
 \sum_{n=0}^z n \frac{x^{z-n}}{(z-n)!} &= \sum_{n=0}^z (z - (z-n)) \frac{x^{z-n}}{(z-n)!} \\
 &= \sum_{k=0}^z (z-k) \frac{x^k}{k!} \\
 &= z \left( \sum_{k=0}^{z-1} \frac{x^k}{k!} + \frac{x^z}{z!} \right) - x \sum_{k=0}^{z-1} \frac{x^k}{k!} \\
 &= \frac{e^x z \Gamma(z, x)}{(z-1)!} + \frac{x^z}{(z-1)!} - \frac{e^x x \Gamma(z, x)}{(z-1)!} = \frac{x^z - e^x (x-z) \Gamma(z, x)}{\Gamma(z)}.
 \end{aligned}$$

A.2 Proof of equation (8):

$$\begin{aligned}
 \sum_{n=0}^{\infty} n \cdot e^{-\rho} \frac{\rho^{z+n}}{(z+n)!} &= e^{-\rho} \left( \sum_{n=0}^{\infty} (n+z) \frac{\rho^{z+n}}{(z+n)!} - z \sum_{n=0}^{\infty} \frac{\rho^{z+n}}{(z+n)!} \right) \\
 &= e^{-\rho} \left( \rho \sum_{n=0}^{\infty} \frac{\rho^{(z-1)+n}}{((z-1)+n)!} - z \sum_{n=0}^{\infty} \frac{\rho^{(z-1)+n+1}}{((z-1)+n+1)!} \right) \\
 &= e^{-\rho} \left( \rho \frac{\rho^{z-1}}{(z-1)!} + \rho \sum_{n=1}^{\infty} \frac{\rho^{(z-1)+n}}{((z-1)+n)!} - z \sum_{n=1}^{\infty} \frac{\rho^{(z-1)+n}}{((z-1)+n)!} \right) \\
 &= e^{-\rho} \left( \frac{\rho^z}{(z-1)!} + (\rho - z) \sum_{n=0}^{\infty} \frac{\rho^{z+n}}{(z+n)!} \right) = \frac{e^{-\rho} \rho^z}{\Gamma(z)} + (\rho - z) \left( 1 - \frac{\Gamma(z, \rho)}{\Gamma(z)} \right).
 \end{aligned}$$

A.3 Proof of Theorem 1: Applying (9) it follows that  $f$  satisfies

$$f(z+1) + f(z-1) - 2f(z) = \frac{e^{-\rho} \rho^z (u+v)}{\Gamma(z+1)} > 0,$$

for  $z = 1, 2, \dots$ , and therefore  $f$  is *discrete convex* in  $z$  and has a minimizer (see e.g., Murota 2003, p. 14).  $\square$

A.4 Proof of Theorem 2: The Hessian matrix of  $f(\bar{\alpha})$  is positive-semi-definite since its eigenvalues are

$$\vec{\Lambda} = (0, 0, \dots, \frac{\lambda \rho(\bar{\alpha})^z e^{-\rho(\bar{\alpha})} \left( \sum_{j=1}^n \prod_{k \neq j} \mu_k^2 \right) (u+v)}{\prod_{j=1}^n \mu_j \cdot \left( \sum_{j=1}^n \prod_{k \neq j} \alpha_j \mu_k \right) \Gamma(z)}, \quad (23)$$

which are  $\Lambda_j \geq 0$  for all  $j$ . The domain  $\{\bar{\alpha} \mid \sum_j \alpha_j = 1, \alpha_j \geq 0\}$  is a compact set and  $f$  is continuous with respect to  $\bar{\alpha}$ .  $\square$

## E2

### Demand and Service Stationarity Testing

We treat each process involving station  $j$  as a time series. We use a time unit based on the daily system activity to conduct this analysis. Our null hypothesis is that the arrival and service processes involving a station are stationary.

The following figures, EC.1 - EC.2, and Figures EC.3 - EC.4, represent the results of the ADF and PP tests for time-series stationarity of the arrival and service processes. The black bars in the figures indicate the critical value of  $-3.41$  for a p-value lower than 0.01. The ADF test shows statistical significance for all stations for both the arrival and service processes.

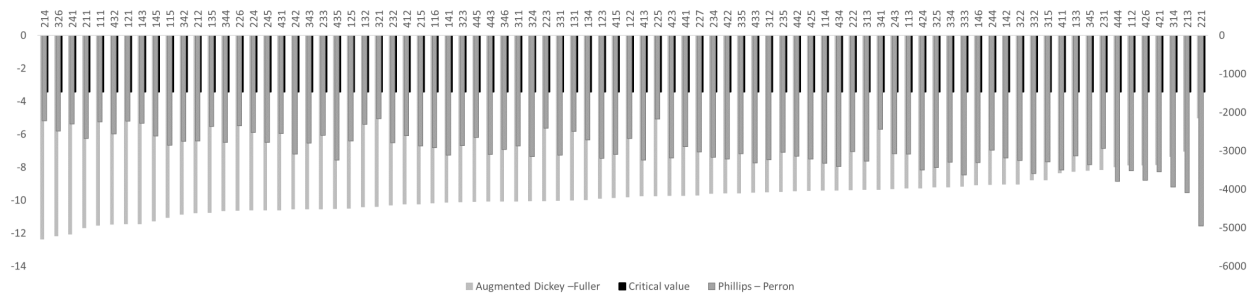

**Figure EC.1 Augmented Dickey-Fuller and Phillips-Perron stationarity tests of demand for chiefs - station level**

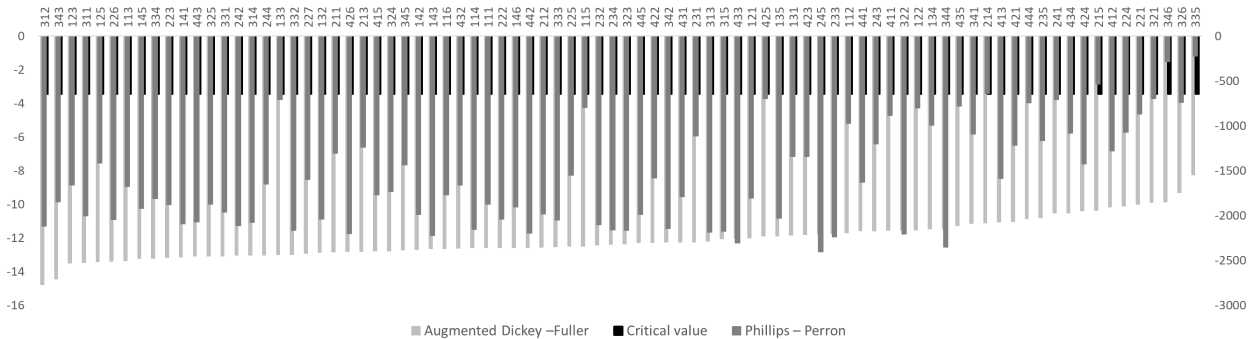

**Figure EC.2 Augmented Dickey-Fuller and Phillips-Perron stationarity tests for service of chiefs - station level**

Similarly, the PP test exhibited significance for all arrivals and most stations (with failures for Stations 215, 346, and 335, where the test statistic is just below the critical value). Thus, out of a total of 332 tests (84 stations multiplied by four tests), we observed three failures at the 0.01 confidence level.

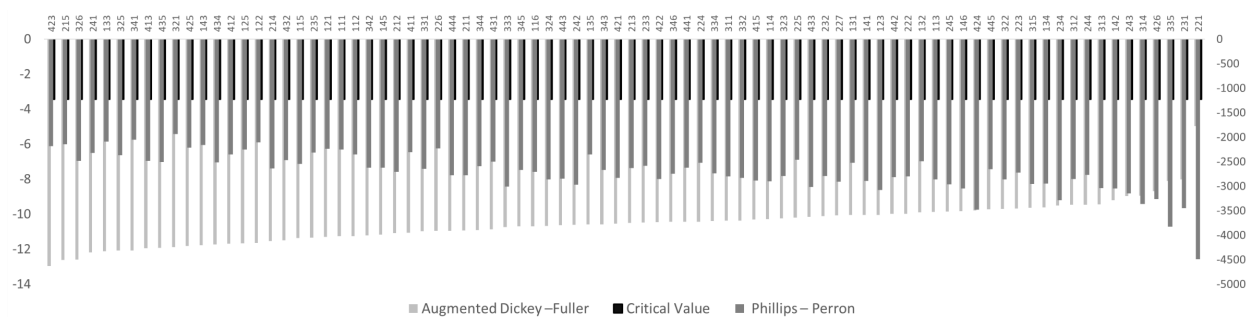

**Figure EC.3 Augmented Dickey-Fuller and Phillips-Perron stationarity tests of demand for pumpers - station level**

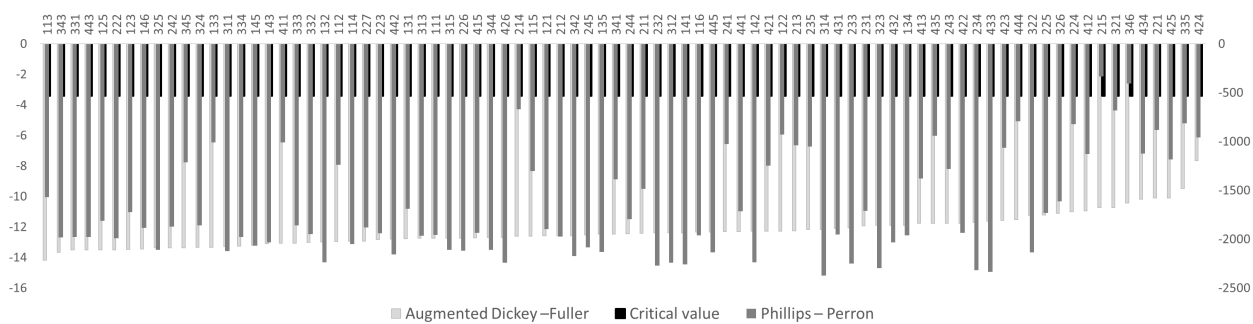

**Figure EC.4 Augmented Dickey-Fuller and Phillips-Perron stationarity tests for service of pumpers - station level**

**E3**

Table EC.5 compares the number of occupied pumpers for each district in the data (empirical) to the same parameter calculated from our model ( $M_i/G_i/\infty$ ). The level of agreement between these two sets of numbers further supports the usage of our model for solving the EVF problem.

| # of occupied pumpers | District 11 |                  | District 13 |                  | District 14 |                  | District 21 |                  |
|-----------------------|-------------|------------------|-------------|------------------|-------------|------------------|-------------|------------------|
|                       | Empirical   | $M_i/G_i/\infty$ | Empirical   | $M_i/G_i/\infty$ | Empirical   | $M_i/G_i/\infty$ | Empirical   | $M_i/G_i/\infty$ |
| 0                     | 0.7806      | 0.75             | 0.8         | 0.795533         | 0.756       | 0.73             | 0.936       | 0.934            |
| 1                     | 0.167       | 0.215            | 0.156       | 0.181972         | 0.18        | 0.23             | 0.058       | 0.0635           |
| 2                     | 0.039       | 0.03             | 0.029       | 0.02             | 0.045       | 0.037            | 0.005       | 0.0022           |
| 3                     | 0.01        | 0.0029           | 0.0045      | 0.0016           | 0.0125      | 0.0038           | $\approx 0$ | $\approx 0$      |
| 4                     | 0.0017      | 0.00021          | 0.00047     | 0.00009          | 0.002       | 0.0003           | -           | -                |
| 5                     | $\approx 0$ | $\approx 0$      | $\approx 0$ | $\approx 0$      | $\approx 0$ | $\approx 0$      | -           | -                |
| # of occupied pumpers | District 22 |                  | District 23 |                  | District 24 |                  | District 41 |                  |
|                       | Empirical   | $M_i/G_i/\infty$ | Empirical   | $M_i/G_i/\infty$ | Empirical   | $M_i/G_i/\infty$ | Empirical   | $M_i/G_i/\infty$ |
| 0                     | 0.8         | 0.795            | 0.86        | 0.864            | 0.873       | 0.868            | 0.945       | 0.947            |
| 1                     | 0.156       | 0.182            | 0.128       | 0.126            | 0.11        | 0.122            | 0.054       | 0.051            |
| 2                     | 0.029       | 0.02             | 0.01        | 0.009            | 0.014       | 0.0086           | -           | -                |
| 3                     | 0.0047      | 0.0016           | 0.0004      | 0.00045          | 0.00094     | 0.0004           | -           | -                |
| 4                     | 0.00046     | 0.00009          | -           | -                | -           | -                | -           | -                |
| 5                     | -           | -                | -           | -                | -           | -                | -           | -                |
| # of occupied pumpers | District 42 |                  | District 43 |                  | District 44 |                  |             |                  |
|                       | Empirical   | $M_i/G_i/\infty$ | Empirical   | $M_i/G_i/\infty$ | Empirical   | $M_i/G_i/\infty$ |             |                  |
| 0                     | 0.9         | 0.91             | 0.872       | 0.86             | 0.82        | 0.81             |             |                  |
| 1                     | 0.086       | 0.083            | 0.108       | 0.127            | 0.156       | 0.163            |             |                  |
| 2                     | 0.0034      | 0.0038           | 0.017       | 0.0094           | 0.021       | 0.016            |             |                  |
| 3                     | -           | -                | -           | -                | 0.0013      | 0.001            |             |                  |

**Table EC.5** The distribution of the number of occupied pumpers in a district is Poisson.

## E4

| Run-Area\Station                   | $\alpha_{i,j}^*$ (%) |            |            |            |            | $P(RT_i \leq 384)$ |                                                         |
|------------------------------------|----------------------|------------|------------|------------|------------|--------------------|---------------------------------------------------------|
|                                    | Station 1            | Station 2  | Station 3  | Station 4  | Station 5  |                    |                                                         |
| RA - 311                           | <b>88</b>            | 0          | 0          | 12         | 0          | 0.915              | <b>Case 1</b><br>$v = 1, u = 10$<br>Mean cost 3.657     |
| RA - 312                           | 0                    | <b>0</b>   | 50         | 34         | 16         | 0.977              |                                                         |
| RA - 313                           | 7                    | 0          | <b>49</b>  | 33         | 11         | 0.933              |                                                         |
| RA - 314                           | 0                    | 0          | 0          | <b>22</b>  | 78         | 0.985              |                                                         |
| RA - 315                           | 0                    | 0          | 21         | 0          | <b>79</b>  | 0.931              |                                                         |
| Optimal Number of Vehicles $z_i^*$ | 1                    | 0          | 1          | 1          | 1          | $z^* = 4$          |                                                         |
| $\rho$                             | 0.0426               | 0          | 0.0528     | 0.0494     | 0.093      |                    |                                                         |
| RA - 311                           | <b>88</b>            | 0          | 0          | 12         | 0          | 0.915              | <b>Case 2</b><br>$v = 1, u = 20$<br>Mean cost 3.67      |
| RA - 312                           | 32                   | <b>0</b>   | 41         | 22         | 5          | 0.968              |                                                         |
| RA - 313                           | 7                    | 0          | <b>49</b>  | 33         | 11         | 0.933              |                                                         |
| RA - 314                           | 0                    | 0          | 0          | <b>22</b>  | 78         | 0.985              |                                                         |
| RA - 315                           | 0                    | 0          | 21         | 0          | <b>79</b>  | 0.931              |                                                         |
| Optimal number of Vehicles $z_i^*$ | 1                    | 0          | 1          | 1          | 1          | $z^* = 4$          |                                                         |
| $\rho$                             | 0.052                | 0          | 0.05       | 0.045      | 0.089      |                    |                                                         |
| RA - 311                           | <b>84</b>            | 0          | 13         | 2          | 1          | 0.933              | <b>Case 3</b><br>$v = 1, u = 60$<br>Mean cost 3.72      |
| RA - 312                           | 25                   | <b>0</b>   | 60         | 4          | 11         | 0.969              |                                                         |
| RA - 313                           | 16                   | 0          | <b>65</b>  | 12         | 7          | 0.902              |                                                         |
| RA - 314                           | 0                    | 0          | 38         | <b>23</b>  | 39         | 0.983              |                                                         |
| RA - 315                           | 0                    | 0          | 20         | 3          | <b>77</b>  | 0.932              |                                                         |
| Optimal Number of Vehicles $z_i^*$ | 1                    | 0          | 1          | 1          | 1          | $z^* = 4$          |                                                         |
| $\rho$                             | 0.054                | 0          | 0.095      | 0.024      | 0.063      |                    |                                                         |
| RA - 311                           | <b>100</b>           | 0          | 0          | 0          | 0          | 0.952              | <b>Case 4</b><br>$v = 1, u = 100$<br>Mean cost 3.765    |
| RA - 312                           | 0                    | <b>0</b>   | 100        | 0          | 0          | 0.975              |                                                         |
| RA - 313                           | 0                    | 0          | <b>100</b> | 0          | 0          | 0.965              |                                                         |
| RA - 314                           | 0                    | 0          | 0          | <b>100</b> | 0          | 0.978              |                                                         |
| RA - 315                           | 0                    | 0          | 0          | 0          | <b>100</b> | 0.980              |                                                         |
| Optimal Number of Vehicles $z_i^*$ | 1                    | 0          | 1          | 1          | 1          | $z^* = 4$          |                                                         |
| $\rho$                             | 0.0427               | 0          | 0.0884     | 0.0603     | 0.0387     |                    |                                                         |
| RA - 311                           | <b>100</b>           | 0          | 0          | 0          | 0          | 0.952              | <b>Case 5</b><br>$v = 1, u = 7,000$<br>Mean cost 5.601  |
| RA - 312                           | 0                    | <b>100</b> | 0          | 0          | 0          | 0.988              |                                                         |
| RA - 313                           | 0                    | 0          | <b>100</b> | 0          | 0          | 0.965              |                                                         |
| RA - 314                           | 0                    | 0          | 0          | <b>100</b> | 0          | 0.978              |                                                         |
| RA - 315                           | 0                    | 0          | 0          | 0          | <b>100</b> | 0.980              |                                                         |
| Optimal number of Vehicles $z_i^*$ | 1                    | 1          | 1          | 1          | 1          | $z^* = 5$          |                                                         |
| $\rho$                             | 0.0427               | 0.031      | 0.056      | 0.06       | 0.038      |                    |                                                         |
| RA - 311                           | <b>100</b>           | 0          | 0          | 0          | 0          | 0.952              | <b>Case 6</b><br>$v = 1, u = 10,000$<br>Mean cost 5.797 |
| RA - 312                           | 0                    | <b>100</b> | 0          | 0          | 0          | 0.988              |                                                         |
| RA - 313                           | 0                    | 0          | <b>100</b> | 0          | 0          | 0.965              |                                                         |
| RA - 314                           | 0                    | 0          | 0          | <b>100</b> | 0          | 0.978              |                                                         |
| RA - 315                           | 0                    | 0          | 0          | 0          | <b>100</b> | 0.980              |                                                         |
| Optimal number of Vehicles $z_i^*$ | 1                    | 1          | 1          | 1          | 2          | $z^* = 6$          |                                                         |
| $\rho$                             | 0.0427               | 0.031      | 0.056      | 0.06       | 0.019      |                    |                                                         |

Table EC.6 Optimal capacity, deployment and mutual aid

E5

| Station  | 114 | 132 | 141 | 212 | 225 | 231 | 242 | 312 | 323 | 332 | 345 | 415 | 423 | 435 | 445 |
|----------|-----|-----|-----|-----|-----|-----|-----|-----|-----|-----|-----|-----|-----|-----|-----|
| 111      | 100 | 0   | 0   | 0   | 0   | 0   | 0   | 0   | 0   | 0   | 0   | 0   | 0   | 0   | 0   |
| 112      | 87  | 5   | 7   | 0   | 0   | 0   | 0   | 0   | 0   | 0   | 0   | 0   | 0   | 0   | 0   |
| 113      | 91  | 0   | 0   | 0   | 0   | 0   | 9   | 0   | 0   | 0   | 0   | 0   | 0   | 0   | 0   |
| 114      | 91  | 7   | 2   | 0   | 0   | 0   | 0   | 0   | 0   | 0   | 0   | 0   | 0   | 0   | 0   |
| 115      | 92  | 0   | 0   | 0   | 0   | 8   | 0   | 0   | 0   | 0   | 0   | 0   | 0   | 0   | 0   |
| 116      | 100 | 0   | 0   | 0   | 0   | 0   | 0   | 0   | 0   | 0   | 0   | 0   | 0   | 0   | 0   |
| 121      | 35  | 65  | 0   | 0   | 0   | 0   | 0   | 0   | 0   | 0   | 0   | 0   | 0   | 0   | 0   |
| 122      | 79  | 21  | 0   | 0   | 0   | 0   | 0   | 0   | 0   | 0   | 0   | 0   | 0   | 0   | 0   |
| 123      | 86  | 14  | 0   | 0   | 0   | 0   | 0   | 0   | 0   | 0   | 0   | 0   | 0   | 0   | 0   |
| 125      | 0   | 9   | 0   | 0   | 0   | 0   | 0   | 91  | 0   | 0   | 0   | 0   | 0   | 0   | 0   |
| 131      | 0   | 100 | 0   | 0   | 0   | 0   | 0   | 0   | 0   | 0   | 0   | 0   | 0   | 0   | 0   |
| 132      | 0   | 97  | 0   | 0   | 0   | 0   | 0   | 0   | 0   | 3   | 0   | 0   | 0   | 0   | 0   |
| 133      | 0   | 85  | 8   | 0   | 0   | 0   | 0   | 0   | 0   | 0   | 0   | 7   | 0   | 0   | 0   |
| 134      | 0   | 86  | 0   | 0   | 0   | 0   | 14  | 0   | 0   | 0   | 0   | 0   | 0   | 0   | 0   |
| 135      | 0   | 85  | 0   | 0   | 0   | 0   | 9   | 0   | 0   | 6   | 0   | 0   | 0   | 0   | 0   |
| 141      | 3   | 0   | 97  | 0   | 0   | 0   | 0   | 0   | 0   | 0   | 0   | 0   | 0   | 0   | 0   |
| 142      | 0   | 0   | 98  | 0   | 0   | 0   | 0   | 0   | 0   | 2   | 0   | 0   | 0   | 0   | 0   |
| 143      | 7   | 50  | 43  | 0   | 0   | 0   | 0   | 0   | 0   | 0   | 0   | 0   | 0   | 0   | 0   |
| 145      | 0   | 82  | 18  | 0   | 0   | 0   | 0   | 0   | 0   | 0   | 0   | 0   | 0   | 0   | 0   |
| 146      | 0   | 3   | 93  | 0   | 0   | 0   | 0   | 0   | 0   | 4   | 0   | 0   | 0   | 0   | 0   |
| 211      | 0   | 0   | 0   | 28  | 0   | 72  | 0   | 0   | 0   | 0   | 0   | 0   | 0   | 0   | 0   |
| 212      | 0   | 0   | 0   | 100 | 0   | 0   | 0   | 0   | 0   | 0   | 0   | 0   | 0   | 0   | 0   |
| 213      | 0   | 0   | 0   | 59  | 0   | 38  | 3   | 0   | 0   | 0   | 0   | 0   | 0   | 0   | 0   |
| 214      | 0   | 0   | 0   | 95  | 0   | 5   | 0   | 0   | 0   | 0   | 0   | 0   | 0   | 0   | 0   |
| 215      | 0   | 0   | 0   | 100 | 0   | 0   | 0   | 0   | 0   | 0   | 0   | 0   | 0   | 0   | 0   |
| 221      | 0   | 0   | 0   | 0   | 54  | 46  | 0   | 0   | 0   | 0   | 0   | 0   | 0   | 0   | 0   |
| 222      | 0   | 0   | 0   | 0   | 95  | 5   | 0   | 0   | 0   | 0   | 0   | 0   | 0   | 0   | 0   |
| 223      | 0   | 0   | 0   | 0   | 38  | 62  | 0   | 0   | 0   | 0   | 0   | 0   | 0   | 0   | 0   |
| 224      | 0   | 0   | 0   | 0   | 42  | 0   | 0   | 58  | 0   | 0   | 0   | 0   | 0   | 0   | 0   |
| 225      | 0   | 0   | 0   | 0   | 97  | 0   | 0   | 3   | 0   | 0   | 0   | 0   | 0   | 0   | 0   |
| 226      | 0   | 0   | 0   | 0   | 80  | 0   | 0   | 20  | 0   | 0   | 0   | 0   | 0   | 0   | 0   |
| 227      | 0   | 0   | 0   | 0   | 32  | 0   | 0   | 68  | 0   | 0   | 0   | 0   | 0   | 0   | 0   |
| 231      | 0   | 0   | 0   | 2   | 0   | 96  | 2   | 0   | 0   | 0   | 0   | 0   | 0   | 0   | 0   |
| 232      | 0   | 0   | 0   | 0   | 9   | 82  | 9   | 0   | 0   | 0   | 0   | 0   | 0   | 0   | 0   |
| 233      | 0   | 0   | 0   | 0   | 73  | 27  | 0   | 0   | 0   | 0   | 0   | 0   | 0   | 0   | 0   |
| 234      | 0   | 0   | 0   | 8   | 0   | 92  | 0   | 0   | 0   | 0   | 0   | 0   | 0   | 0   | 0   |
| 235      | 0   | 0   | 0   | 0   | 54  | 0   | 0   | 46  | 0   | 0   | 0   | 0   | 0   | 0   | 0   |
| 241      | 5   | 0   | 0   | 0   | 0   | 95  | 0   | 0   | 0   | 0   | 0   | 0   | 0   | 0   | 0   |
| 242      | 0   | 0   | 0   | 3   | 0   | 97  | 0   | 0   | 0   | 0   | 0   | 0   | 0   | 0   | 0   |
| 243      | 0   | 0   | 0   | 3   | 0   | 56  | 41  | 0   | 0   | 0   | 0   | 0   | 0   | 0   | 0   |
| 244      | 4   | 0   | 0   | 0   | 0   | 96  | 0   | 0   | 0   | 0   | 0   | 0   | 0   | 0   | 0   |
| 245      | 0   | 0   | 0   | 0   | 38  | 63  | 0   | 0   | 0   | 0   | 0   | 0   | 0   | 0   | 0   |
| 311      | 4   | 0   | 0   | 0   | 0   | 93  | 0   | 5   | 0   | 0   | 0   | 0   | 0   | 0   | 0   |
| 312      | 0   | 0   | 0   | 0   | 0   | 92  | 0   | 6   | 2   | 0   | 0   | 0   | 0   | 0   | 0   |
| 313      | 0   | 0   | 0   | 0   | 0   | 83  | 11  | 6   | 0   | 0   | 0   | 0   | 0   | 0   | 0   |
| 314      | 0   | 0   | 0   | 0   | 0   | 54  | 1   | 44  | 1   | 0   | 0   | 0   | 0   | 0   | 0   |
| 315      | 0   | 0   | 0   | 0   | 0   | 34  | 0   | 56  | 10  | 0   | 0   | 0   | 0   | 0   | 0   |
| 321      | 0   | 22  | 0   | 0   | 0   | 18  | 60  | 0   | 0   | 0   | 0   | 0   | 0   | 0   | 0   |
| 322      | 0   | 0   | 0   | 0   | 0   | 4   | 96  | 0   | 0   | 0   | 0   | 0   | 0   | 0   | 0   |
| 323      | 0   | 4   | 0   | 0   | 0   | 4   | 96  | 0   | 0   | 0   | 0   | 0   | 0   | 0   | 0   |
| 324      | 0   | 0   | 0   | 0   | 0   | 4   | 96  | 0   | 0   | 0   | 0   | 0   | 0   | 0   | 0   |
| 325      | 0   | 0   | 0   | 0   | 0   | 22  | 11  | 66  | 0   | 0   | 0   | 0   | 0   | 0   | 0   |
| 326      | 0   | 0   | 0   | 0   | 0   | 0   | 100 | 0   | 0   | 0   | 0   | 0   | 0   | 0   | 0   |
| 331      | 0   | 0   | 0   | 0   | 0   | 0   | 4   | 90  | 6   | 0   | 0   | 0   | 0   | 0   | 0   |
| 332      | 0   | 0   | 0   | 0   | 0   | 8   | 1   | 90  | 1   | 0   | 0   | 0   | 0   | 0   | 0   |
| 333      | 0   | 0   | 0   | 0   | 0   | 9   | 3   | 88  | 0   | 0   | 0   | 0   | 0   | 0   | 0   |
| 334      | 0   | 0   | 0   | 0   | 0   | 7   | 0   | 91  | 2   | 0   | 0   | 0   | 0   | 0   | 0   |
| 335      | 0   | 0   | 0   | 0   | 0   | 0   | 0   | 100 | 0   | 0   | 0   | 0   | 0   | 0   | 0   |
| 341      | 0   | 41  | 0   | 0   | 0   | 0   | 0   | 0   | 53  | 0   | 6   | 0   | 0   | 0   | 0   |
| 342      | 0   | 0   | 0   | 0   | 0   | 0   | 0   | 0   | 69  | 0   | 31  | 0   | 0   | 0   | 0   |
| 343      | 0   | 0   | 0   | 0   | 0   | 0   | 21  | 0   | 79  | 0   | 0   | 0   | 0   | 0   | 0   |
| 344      | 0   | 0   | 0   | 0   | 0   | 0   | 60  | 0   | 2   | 38  | 0   | 0   | 0   | 0   | 0   |
| 345      | 0   | 0   | 0   | 0   | 0   | 0   | 0   | 0   | 92  | 0   | 8   | 0   | 0   | 0   | 0   |
| 346      | 0   | 0   | 0   | 0   | 0   | 0   | 0   | 0   | 100 | 0   | 0   | 0   | 0   | 0   | 0   |
| 411      | 0   | 0   | 71  | 0   | 0   | 0   | 0   | 0   | 0   | 29  | 0   | 0   | 0   | 0   | 0   |
| 412      | 0   | 0   | 0   | 0   | 0   | 0   | 0   | 0   | 0   | 97  | 0   | 0   | 0   | 0   | 3   |
| 413      | 0   | 0   | 3   | 0   | 0   | 0   | 0   | 0   | 0   | 97  | 0   | 0   | 0   | 0   | 0   |
| 415      | 0   | 0   | 3   | 0   | 0   | 0   | 0   | 0   | 0   | 94  | 0   | 0   | 0   | 0   | 4   |
| 421      | 0   | 0   | 0   | 0   | 0   | 0   | 0   | 8   | 0   | 92  | 0   | 0   | 0   | 0   | 0   |
| 422      | 0   | 0   | 0   | 0   | 0   | 0   | 0   | 4   | 0   | 96  | 0   | 0   | 0   | 0   | 0   |
| 423      | 0   | 0   | 0   | 0   | 0   | 0   | 0   | 0   | 11  | 89  | 0   | 0   | 0   | 0   | 0   |
| 424      | 0   | 0   | 0   | 0   | 0   | 0   | 0   | 0   | 0   | 100 | 0   | 0   | 0   | 0   | 0   |
| 425      | 0   | 0   | 0   | 0   | 0   | 0   | 0   | 0   | 0   | 100 | 0   | 0   | 0   | 0   | 0   |
| 426      | 0   | 0   | 0   | 0   | 0   | 0   | 0   | 10  | 64  | 26  | 0   | 0   | 0   | 0   | 0   |
| 431      | 0   | 0   | 0   | 0   | 0   | 0   | 0   | 0   | 0   | 5   | 11  | 84  | 0   | 0   | 0   |
| 432      | 0   | 0   | 0   | 0   | 0   | 0   | 0   | 0   | 0   | 0   | 0   | 91  | 9   | 0   | 0   |
| 433      | 0   | 0   | 0   | 0   | 0   | 0   | 0   | 0   | 0   | 0   | 5   | 88  | 7   | 0   | 0   |
| 434      | 0   | 0   | 0   | 0   | 0   | 0   | 0   | 0   | 0   | 0   | 0   | 93  | 7   | 0   | 0   |
| 435      | 0   | 0   | 0   | 0   | 0   | 0   | 0   | 0   | 0   | 0   | 0   | 95  | 5   | 0   | 0   |
| 441      | 0   | 0   | 0   | 0   | 0   | 0   | 0   | 0   | 0   | 65  | 0   | 1   | 33  | 0   | 0   |
| 442      | 0   | 4   | 22  | 0   | 0   | 0   | 0   | 0   | 0   | 31  | 35  | 0   | 8   | 0   | 0   |
| 443      | 0   | 0   | 0   | 0   | 0   | 0   | 0   | 0   | 0   | 37  | 0   | 0   | 63  | 0   | 0   |
| 444      | 0   | 0   | 0   | 0   | 0   | 0   | 0   | 0   | 0   | 8   | 0   | 0   | 7   | 85  | 0   |
| 445      | 0   | 0   | 0   | 0   | 0   | 0   | 0   | 0   | 0   | 0   | 0   | 10  | 90  | 0   | 0   |
| Vehicles | 1   | 1   | 1   | 1   | 1   | 1   | 1   | 1   | 1   | 1   | 1   | 1   | 1   | 1   | 1   |

  

| Station | 114 | 132 | 141 | 212 | 225 | 231 | 242 | 312 | 323 | 332 | 345 | 415 | 423 | 435 | 445 |
|---------|-----|-----|-----|-----|-----|-----|-----|-----|-----|-----|-----|-----|-----|-----|-----|
| 111     | 100 | 0   | 0   | 0   | 0   | 0   | 0   | 0   | 0   | 0   | 0   | 0   | 0   | 0   | 0   |
| 112     | 34  | 31  | 34  | 0   | 0   | 0   | 0   | 0   | 0   | 0   | 0   | 0   | 0   | 0   | 0   |
| 113     | 100 | 0   | 0   | 0   | 0   | 0   | 0   | 0   | 0   | 0   | 0   | 0   | 0   | 0   | 0   |
| 114     | 96  | 28  | 35  | 0   | 0   | 0   | 0   | 0   | 0   | 0   | 0   | 0   | 0   | 0   | 0   |
| 115     | 100 | 0   | 0   | 0   | 0   | 0   | 0   | 0   | 0   | 0   | 0   | 0   | 0   | 0   | 0   |
| 116     | 100 | 0   | 0   | 0   | 0   | 0   | 0   | 0   | 0   | 0   | 0   | 0   | 0   | 0   | 0   |
| 121     | 50  | 50  | 0   | 0   | 0   | 0   | 0   | 0   | 0   | 0   | 0   | 0   | 0   | 0   | 0   |
| 122     | 50  | 50  | 0   | 0   | 0   | 0   | 0   | 0   | 0   | 0   | 0   | 0   | 0   | 0   | 0   |
| 123     | 50  | 50  | 0   | 0   | 0   | 0   | 0   | 0   | 0   | 0   | 0   | 0   | 0   | 0   | 0   |
| 125     | 0   | 50  | 0   | 0   | 0   | 0   | 0   | 0   | 0   | 50  | 0   | 0   | 0   | 0   | 0   |
| 131     | 0   | 100 | 0   | 0   | 0   | 0   | 0   | 0   | 0   | 0   | 0   | 0   | 0   | 0   | 0   |
| 132     | 0   | 51  | 0   | 0   | 0   | 0   | 0   | 0   | 0   | 0   | 0   | 49  | 0   | 0   | 0   |
| 133     | 0   | 35  | 33  | 0   | 0   | 0   | 0   | 0   | 0   | 0   | 0   | 0   | 0   | 32  | 0   |
| 134     | 0   | 100 | 0   | 0   | 0   | 0   | 0   | 0   | 0   | 0   | 0   | 0   | 0   | 0   | 0   |
| 135     | 0   | 56  | 0   | 0   | 0   | 0   | 0   | 0   | 0   | 0   | 0   | 0   | 44  | 0   | 0   |
| 141     | 45  | 0   | 55  | 0   | 0   | 0   | 0   | 0   | 0   | 0   | 0   | 0   | 0   | 0   | 0   |
| 142     | 0   | 0   | 100 | 0   | 0   | 0   | 0   | 0   | 0   | 0   | 0   | 0   | 0   | 0   | 0   |
| 143     | 84  | 8   | 8   | 0   | 0   | 0   | 0   | 0   | 0   | 0   | 0   | 0   | 0   | 0   | 0   |
| 145     | 0   | 50  | 50  | 0   | 0   | 0   | 0   | 0   | 0   | 0   | 0   | 0   | 0   | 0   | 0   |
| 146     | 0   | 44  | 56  | 0   | 0   | 0   | 0   | 0   | 0   | 0   | 0   | 0   | 0   | 0   | 0   |
| 211     | 0   | 0   | 0   | 100 | 0   | 0   | 0   | 0   | 0   | 0   | 0   | 0   | 0   | 0   | 0   |
| 212     | 0   | 0   | 0   | 100 | 0   | 0   | 0   | 0   | 0   | 0   | 0   | 0   | 0   | 0   | 0   |
| 213     | 0   | 0   | 0   | 51  | 0   | 49  | 0   | 0   | 0   | 0   | 0   | 0   | 0   | 0   | 0   |
| 214     | 0   | 0   | 0   | 95  | 0   | 5   | 0   | 0   | 0   | 0   | 0   | 0   | 0   | 0   | 0   |
| 215     | 0   | 0   | 0   | 100 | 0   | 0   | 0   | 0   | 0   | 0   | 0   | 0   | 0   | 0   | 0   |
| 221     | 0   | 0   | 0   | 0   | 54  | 46  | 0   | 0   | 0   | 0   | 0   | 0   | 0   | 0   | 0   |
| 222     | 0   | 0   | 0   | 0   | 95  | 5   | 0   | 0   | 0   | 0   | 0   | 0   | 0   | 0   | 0   |
| 223     | 0   | 0   | 0   | 0   | 38  | 62  | 0   | 0   | 0   | 0   | 0   | 0   | 0   | 0   | 0   |
| 224     | 0   | 0   | 0   | 0   | 42  | 0   | 0   | 58  | 0   | 0   | 0   | 0   | 0   |     |     |
